# Supplementary material
Source: PubMed Central journal article supplement (PMC4582152)

Figure S1. Sequence alignment of DhelOBP21 with homologous proteins. The yellow lines sign the same amino acid residues of DhelOBP21 and 1C3Y.

Figure S2. The Ramachandran map of the model of DhelOBP21. The scope of orange dashed line expresses the allowed region. The scope of green dashed line expresses the core region. The yellow square means the amino acid located within the allowed region. The green square means the amino acid located within the core region. The red cross means the amino acid that is outlier.

Figure S3. Comparison of orientations for specific ligands in the binding pocket from the four proteins. The green pockets express the binding sites. The green areas express hydrophobicity and red areas express hydrophilia of binding cavity. The red atom is oxygen atom. The blue atom is nitrogen atom. The gray molecule in the cavity is ligand.

Figure S4. The different protonated states at different pH. (A) There are three residues at N-terminal base shown the transformation of protonated states. The green residue is His31. The blue residue is Ser35 and the yellow residue is His62. (B, C) The different protonated states of His31, Ser35 and His62 at pH 7.4 and 5.0. The red atom is oxygen atom. The blue atom is nitrogen-atoms. The light gray atom is hydrogen atom and the dark grey atom is carbon atom.

Figure S1

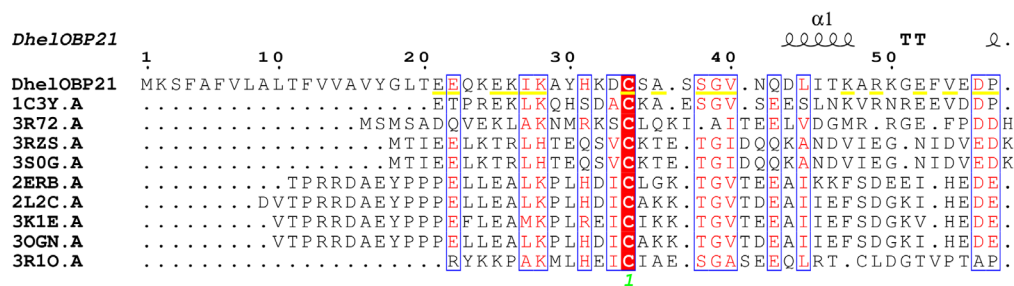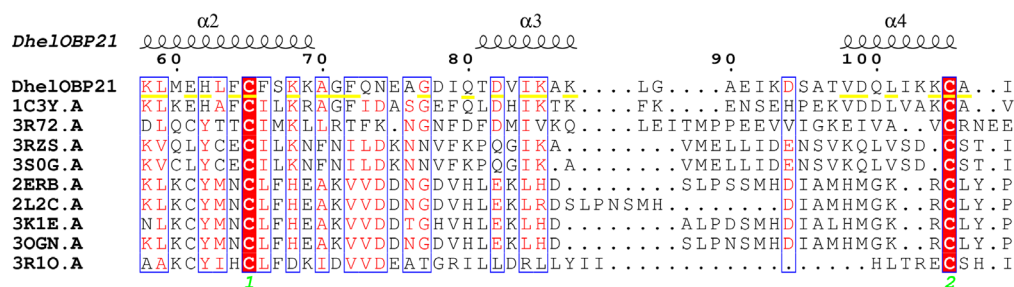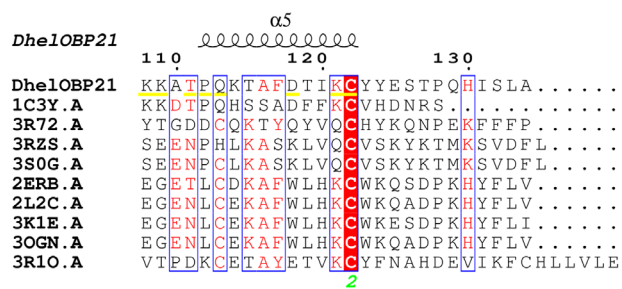

Figure S2

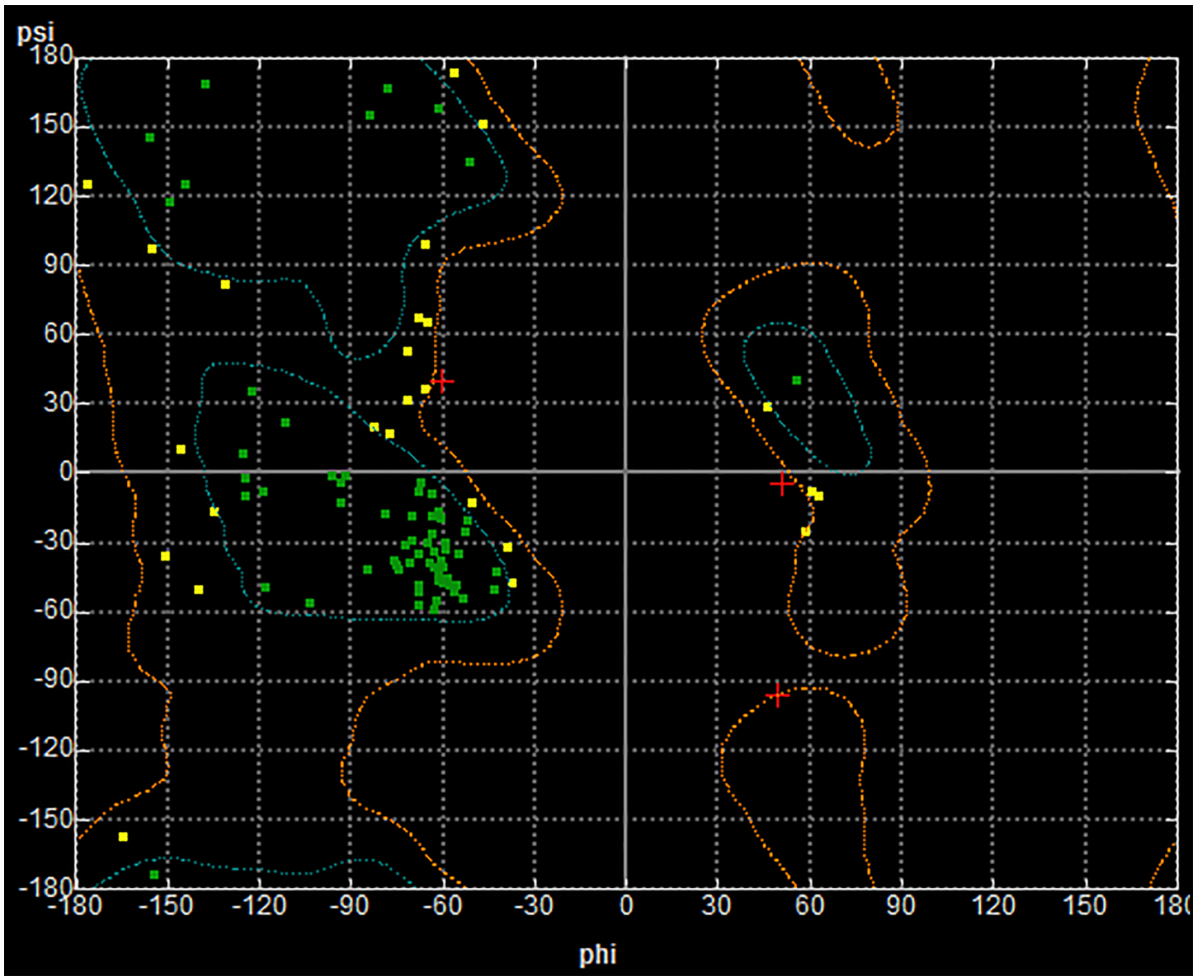

Figure S3

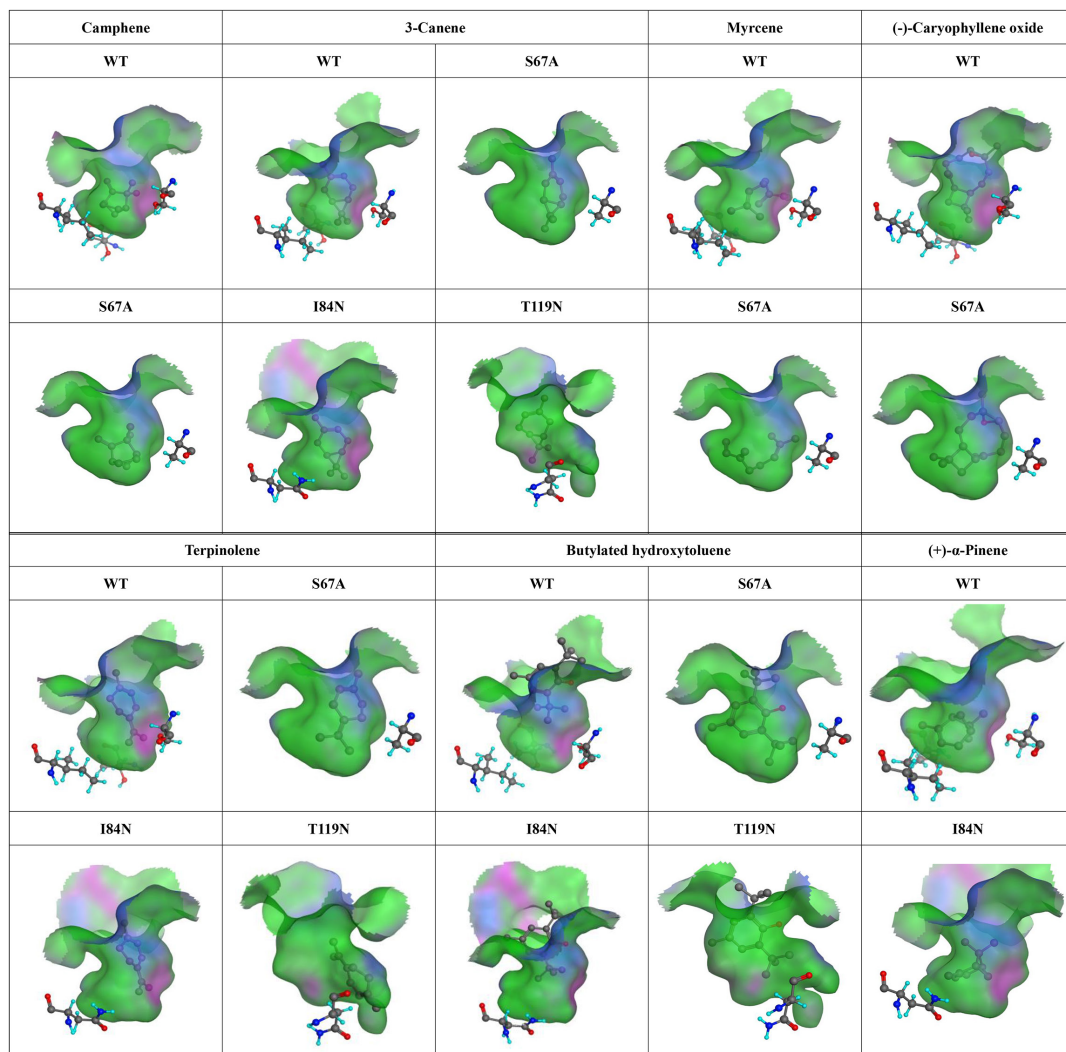

**Figure S4**

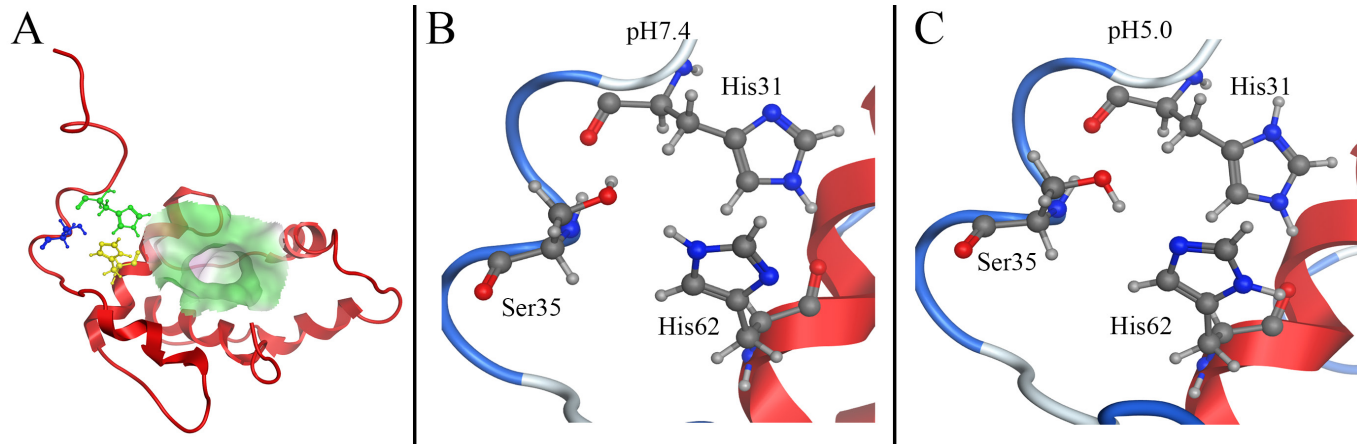

Supplement: ijbsv11p1281s1.pdf [file ijbsv11p1281s1.pdf]
